# Supplementary material
Source: publisher figshare collection journal article supplement (https://geolsoc.figshare.com/articles/dataset/_/3453311)
Supplement: Supplementary file 2 [file 1]

| GSI for limestone - mud rock sequence of Kabir Kuh (surface and near surface conditions) |                                                              | Surface conditions of discontinuities (predominantly bedding planes) | Very good | Good | Fair | Poor | Very poor |    |
|------------------------------------------------------------------------------------------|--------------------------------------------------------------|----------------------------------------------------------------------|-----------|------|------|------|-----------|----|
| Composition and structure                                                                |                                                              |                                                                      | 70        | 60   | 50   | 40   | 30        | 20 |
| K1. Medium bedded limestone lacking shale.                                               | K2. Thin bedded limestone lacking shale.                     | K3. Thin bedded limestone with minor shale.                          | K1        | K2   | K3   |      |           |    |
| K4. Limestone with thin inter-layers of shale.                                           | K5. Limestone with inter-layers of shale in similar amounts. | K6. Shale with thin inter-layers of limestone.                       |           | K4   | K5   | K6   |           |    |
| K7. Shale with or without a few limestone layers.                                        |                                                              |                                                                      |           |      | K7   |      |           |    |

Roberts and Evans  
Supplementary Material Fig.D 1
